# Supplementary material
Source: PubMed Central journal article supplement (PMC8579228)
Supplement: 2021-02-08-b3glct_hydrocephalus_supplement-vsubmit-final_cwab033.pdf [file 2021-02-08-b3glct_hydrocephalus_supplement-vsubmit-final_cwab033.pdf]

**Supplementary Materials for:**

**Hydrocephalus in mouse *B3glct* mutants is likely caused by defects in multiple B3GLCT substrates in ependymal cells and subcommissural organ**

Sanjiv Neupane <sup>1</sup>, June Goto <sup>2</sup>, Steven J. Berardinelli <sup>3</sup>, Atsuko Ito <sup>3</sup>, Robert S. Haltiwanger <sup>3</sup>,  
and Bernadette C. Holdener <sup>1\*</sup>

Contents:

Supplemental Table I

Supplemental Figures 1-4

**Supplemental Table I: Primers used for qRT-PCR**

| <b>Gene</b>           | <b>Forward Primer (5'-&gt;3')</b> | <b>Reverse Primer (5'-&gt;3')</b>  | <b>References</b>                          |
|-----------------------|-----------------------------------|------------------------------------|--------------------------------------------|
| <i>Chop</i>           | CCT AGC TTG GCT GAC AGA GG        | CTG CTC CTT CTC CTT CAT GC         | (Deldicque, L., Bertrand, L., et al. 2011) |
| <i>Atf4</i>           | GAG CTT CCT GAA CAG CGA AGT G     | TGG CCA CCT CCA GAT AGT CAT C      |                                            |
| <i>Xbp1-Spliced</i>   | GAG TCC GCA GCA GGT G             | GTG TCA GAG TCC ATG GGA            |                                            |
| <i>Xbp1-Unspliced</i> | AAG AAC ACG CTT GGG AAT GG        | ACT CCC CTT GGC CTC CAC            |                                            |
| <i>BiP</i>            | TTC AGC CAA TTA TCA GCA AAC TCT   | TTT TCT GAT GTA TCC TCT TCA CCA GT |                                            |
| <i>Total XbP1</i>     | TGG CCG GGT CTG CTG AGT CCG       | GTC CAT GGG AAG ATG TTC TGG        |                                            |
| <i>Hprt</i>           | CCT AAG ATG AGC GCA AGT TG        | CAC AGG ACT AGA ACA CCT GCT AA     | (Bang, S.P., Yeon, C.Y., et al. 2019)      |
| <i>B3glct</i>         | TCC GCG GCT TTT GCT TTG AT        | TCT GCC TCA AAT CCT GAG AAG G      | This study                                 |
| <i>Pofut2</i>         | CTGTACTCGCAGGACAAGCA              | TCAGACCCCGTGTTTCTTCG               | This study                                 |

**Supplemental Figure 1. *Pofut2* mRNA localization in brain at E16 and P4**

**(A-G)** *Pofut2* mRNA localization at E16 **(A-E)** and P4 **(F-G')**. Areas indicated by black rectangles in panel A, F and G are expanded in panels B-E, F'-F'' and G', respectively. Scale bars: panels A, F and G 500  $\mu$ m; panels B-E, F'-F'' and G' 50  $\mu$ m. Abbreviations: vz, ventricular zone of cortex; cp, choroid plexus; ec, ependymal cells of lateral ventricle; sco, subcommissural organ.

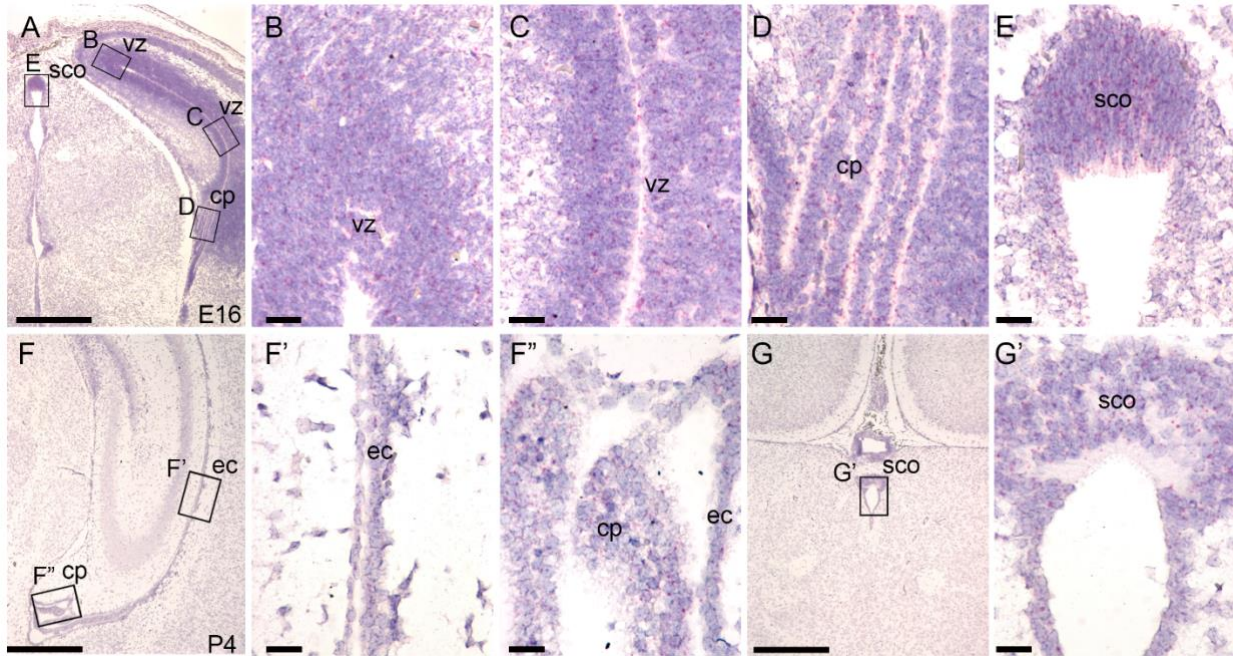

**Supplemental Figure 2: MS2 spectra of ions corresponding to O-fucosylated peptides from SSPO TSRs 6, 7, 8 and 9.** MS2 spectra of the disaccharide form of peptides containing the POFUT2 consensus sequence from each TSR are shown. The parent ion masses (shown on the right, charge state in parentheses) were used to generate the EICs in Fig. 4B. The masses for the other glycoforms were calculated. Due to the lability of the fucose-peptide bond in high energy collision dissociation experiments, Byonic is frequently unable to correctly assign the O-fucosylated Ser/Thr residue in a peptide. All assignments are based on the well-documented consensus sequence for O-fucosylation of TSRs: C-X-X-(S/T)-C.

**TSR6 [W].TACDRSCGSGVRRARF.[R]**

| #1 | b <sup>+</sup> | b <sup>2+</sup> | b <sup>3+</sup> | b <sup>4+</sup> | Seq.         | y <sup>+</sup> | y <sup>2+</sup> | y <sup>3+</sup> | y <sup>4+</sup> | #2 |
|----|----------------|-----------------|-----------------|-----------------|--------------|----------------|-----------------|-----------------|-----------------|----|
| 1  | 410.16569      | 205.58648       | 137.39341       | 103.29688       | T-Hex(1)F... |                |                 |                 |                 | 15 |
| 2  | 481.20280      | 241.10504       | 161.07245       | 121.05616       | A            | 1598.72745     | 799.86736       | 533.58067       | 400.43732       | 14 |
| 3  | 641.23345      | 321.12036       | 214.41600       | 161.06382       | C-Carbami... | 1527.69034     | 764.34881       | 509.90163       | 382.67804       | 13 |
| 4  | 756.26039      | 378.63383       | 252.75832       | 189.82056       | D            | 1367.65969     | 684.33348       | 456.55808       | 342.67038       | 12 |
| 5  | 912.36150      | 456.68439       | 304.79202       | 228.84583       | R            | 1252.63275     | 626.82001       | 418.21577       | 313.91364       | 11 |
| 6  | 999.39353      | 500.20040       | 333.80270       | 250.60384       | S            | 1096.53164     | 548.76946       | 366.18206       | 274.88837       | 10 |
| 7  | 1159.42418     | 580.21573       | 387.14624       | 290.61150       | C-Carbami... | 1009.49961     | 505.25344       | 337.17139       | 253.13036       | 9  |
| 8  | 1216.44564     | 608.72646       | 406.15340       | 304.86687       | G            | 849.46896      | 425.23812       | 283.82784       | 213.12270       | 8  |
| 9  | 1303.47767     | 652.24247       | 435.16408       | 326.62488       | S            | 792.44750      | 396.72739       | 264.82068       | 198.86733       | 7  |
| 10 | 1360.49914     | 680.75321       | 454.17123       | 340.88024       | G            | 705.41547      | 353.21137       | 235.81001       | 177.10932       | 6  |
| 11 | 1459.56755     | 730.28741       | 487.19403       | 365.64734       | V            | 648.39400      | 324.70064       | 216.80285       | 162.85396       | 5  |
| 12 | 1615.66866     | 808.33797       | 539.22774       | 404.67262       | R            | 549.32559      | 275.16643       | 183.78005       | 138.08686       | 4  |
| 13 | 1686.70577     | 843.85653       | 562.90678       | 422.43190       | A            | 393.22448      | 197.11588       | 131.74634       | 99.06158        | 3  |
| 14 | 1842.80689     | 921.90708       | 614.94048       | 461.45718       | R            | 322.18737      | 161.59732       | 108.06731       | 81.30230        | 2  |
| 15 |                |                 |                 |                 | F            | 166.08626      | 83.54677        | 56.03360        | 42.27702        | 1  |

-  502.72620 (4)
-  462.21300 (4)
-  425.69852 (4)

AI091919\_2.raw #3202 RT: 12.3860 min  
FTMS, 502.7260@hcd27.00, z=+4, Mono m/z=502.72620 Da, MH+=2007.88296 Da, Match Tol.=20 ppm

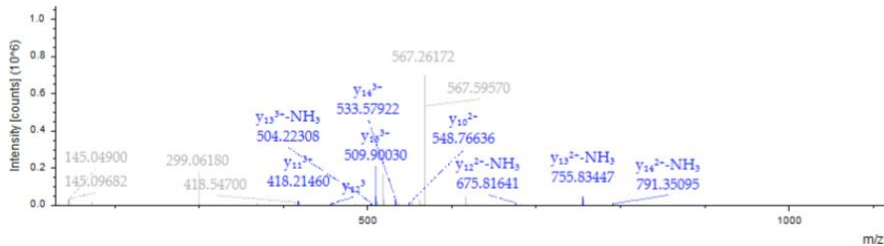

**TSR7 [W].SSCSQSLVPGGDPGWR.[Q]**

| #1 | b <sup>+</sup> | b <sup>2+</sup> | Seq.         | y <sup>+</sup> | y <sup>2+</sup> | #2 |
|----|----------------|-----------------|--------------|----------------|-----------------|----|
| 1  | 88.03930       | 44.52329        | S            |                |                 | 17 |
| 2  | 175.07133      | 88.03930        | S            | 2070.87430     | 1035.94079      | 16 |
| 3  | 335.10198      | 168.05463       | C-Carbami... | 1983.84227     | 992.42477       | 15 |
| 4  | 730.24474      | 365.62601       | S-Hex(1)F... | 1823.81162     | 912.40945       | 14 |
| 5  | 858.30332      | 429.65530       | Q            | 1428.66886     | 714.83807       | 13 |
| 6  | 945.33535      | 473.17131       | S            | 1300.61028     | 650.80878       | 12 |
| 7  | 1105.36600     | 553.18664       | C-Carbami... | 1213.57825     | 607.29276       | 11 |
| 8  | 1218.45006     | 609.72867       | L            | 1053.54760     | 527.27744       | 10 |
| 9  | 1317.51847     | 659.26288       | V            | 940.46354      | 470.73541       | 9  |
| 10 | 1414.57124     | 707.78926       | P            | 841.39513      | 421.20120       | 8  |
| 11 | 1471.59270     | 736.29999       | G            | 744.34236      | 372.67482       | 7  |
| 12 | 1528.61417     | 764.81072       | G            | 687.32090      | 344.16409       | 6  |
| 13 | 1643.64111     | 822.32419       | D            | 630.29944      | 315.65336       | 5  |
| 14 | 1740.69387     | 870.85057       | P            | 515.27249      | 258.13988       | 4  |
| 15 | 1797.71534     | 899.36131       | G            | 418.21973      | 209.61350       | 3  |
| 16 | 1983.79465     | 992.40096       | W            | 361.19827      | 181.10277       | 2  |
| 17 |                |                 | R            | 175.11895      | 88.06311        | 1  |

-  1079.4574 (2), 719.9741 (3)
-  998.43095 (2), 665.95647 (3)
-  925.40200 (2), 617.27050 (3)

AI061920\_3.raw #6422 RT: 19.2394 min  
FTMS, 1079.9586@hcd27.00, z=+2, Mono m/z=1079.45740 Da, MH+=2157.90752 Da, Match Tol.=30 ppm

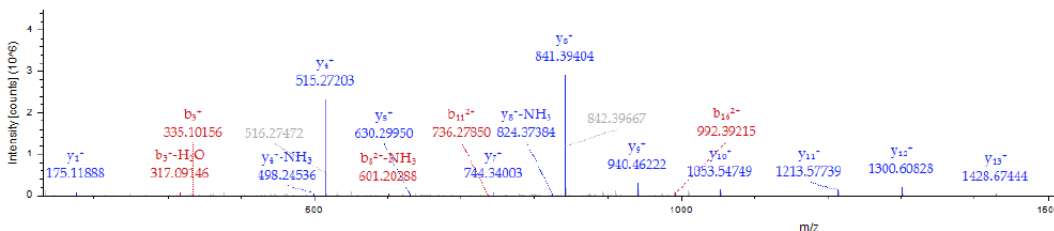

TSR8 [W].STCSA\_S\_CNGGIQTR.[G]

| #1 | b <sup>+</sup> | b <sup>2+</sup> | Seq.         | y <sup>+</sup> | y <sup>2+</sup> | #2 |
|----|----------------|-----------------|--------------|----------------|-----------------|----|
| 1  | 396.15004      | 198.57866       | S-Hex(1)F... |                |                 | 14 |
| 2  | 497.19772      | 249.10250       | T            | 1412.58929     | 706.79828       | 13 |
| 3  | 657.22836      | 329.11782       | C-Carbami... | 1311.54161     | 656.27444       | 12 |
| 4  | 744.26039      | 372.63383       | S            | 1151.51096     | 576.25912       | 11 |
| 5  | 815.29751      | 408.15239       | A            | 1064.47893     | 532.74310       | 10 |
| 6  | 902.32953      | 451.66841       | S            | 993.44182      | 497.22455       | 9  |
| 7  | 1062.36018     | 531.68373       | C-Carbami... | 906.40979      | 453.70853       | 8  |
| 8  | 1177.38713     | 589.19720       | N-Deamid...  | 746.37914      | 373.69321       | 7  |
| 9  | 1234.40859     | 617.70793       | G            | 631.35220      | 316.17974       | 6  |
| 10 | 1291.43005     | 646.21867       | G            | 574.33074      | 287.66901       | 5  |
| 11 | 1404.51412     | 702.76070       | I            | 517.30927      | 259.15827       | 4  |
| 12 | 1532.57270     | 766.78999       | Q            | 404.22521      | 202.61624       | 3  |
| 13 | 1633.62037     | 817.31383       | T            | 276.16663      | 138.58695       | 2  |
| 14 |                |                 | R            | 175.11895      | 88.06311        | 1  |

-  904.36847 (2), 603.24695 (3)
-  823.34202 (2), 549.22932 (3)
-  750.31307 (2), 500.54335 (3)

AI061920\_3.raw #3290 RT: 12.0196 min  
FTMS, 904.3685@hcd27.00, z=+2, Mono m/z=904.36847 Da, MH+=1807.72966 Da, Match Tol=30 ppm

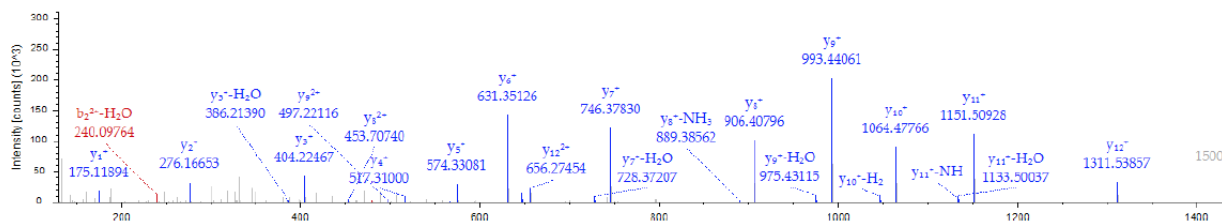

TSR9 [W].SPCSQSCNVGIR.[R]

| #1 | b <sup>+</sup> | b <sup>2+</sup> | Seq.         | y <sup>+</sup> | y <sup>2+</sup> | #2 |
|----|----------------|-----------------|--------------|----------------|-----------------|----|
| 1  | 396.15004      | 198.57866       | S-Hex(1)F... |                |                 | 12 |
| 2  | 493.20280      | 247.10504       | P            | 1277.57252     | 639.28990       | 11 |
| 3  | 653.23345      | 327.12036       | C-Carbami... | 1180.51975     | 590.76351       | 10 |
| 4  | 740.26548      | 370.63638       | S            | 1020.48910     | 510.74819       | 9  |
| 5  | 868.32406      | 434.66567       | Q            | 933.45708      | 467.23218       | 8  |
| 6  | 955.35608      | 478.18168       | S            | 805.39850      | 403.20289       | 7  |
| 7  | 1115.38673     | 558.19700       | C-Carbami... | 718.36647      | 359.68687       | 6  |
| 8  | 1229.42966     | 615.21847       | N            | 558.33582      | 279.67155       | 5  |
| 9  | 1328.49807     | 664.75268       | V            | 444.29289      | 222.65009       | 4  |
| 10 | 1385.51954     | 693.26341       | G            | 345.22448      | 173.11588       | 3  |
| 11 | 1498.60360     | 749.80544       | I            | 288.20302      | 144.60515       | 2  |
| 12 |                |                 | R            | 175.11895      | 88.06311        | 1  |

-  836.86108 (2)
-  823.34202 (2)
-  750.31307 (2)

AI061920\_3.raw #3799 RT: 13.2194 min  
FTMS, 836.8611@hcd27.00, z=+2, Mono m/z=836.86108 Da, MH+=1672.71489 Da, Match Tol=30 ppm

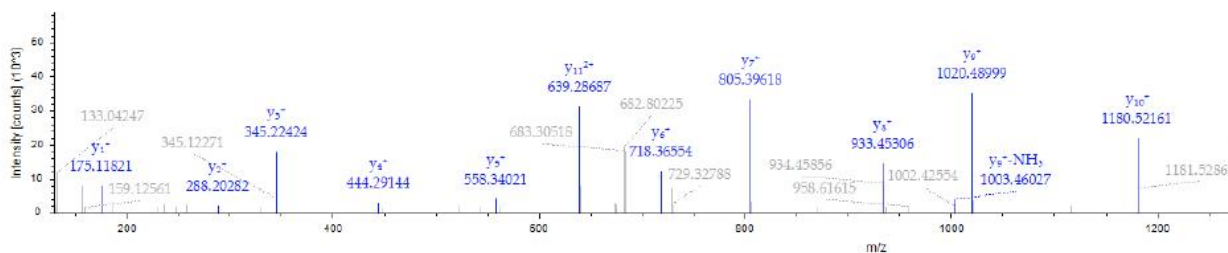

**Supplemental Figure 3: MS2 spectra of ions corresponding to C-mannosylated peptides from SSPO TSRs 6, 7, 8 and 9.** MS2 spectra of the most abundant form of peptides containing the W-x-x-W/C consensus sequence from each TSR are shown. The parent ion masses (shown on the right, charge state in parentheses) were used to generate the EICs in Fig. 4C. The masses for the other glycoforms were calculated. Since the C-mannose linkage to tryptophan is stable, the presence of specific b- and/or y-ions reveals the location of the C-mannose in the peptides from TSRs 6, 7 and 8. There are not sufficient b- and/or y-ions to determine the location of the C-mannose on the peptide from TSR9.

**TSR6 [R].TYEALSCGWSAWSPWTACDR.[S]**

| #1 | b <sup>+</sup> | b <sup>2+</sup> | Seq.         | y <sup>+</sup> | y <sup>2+</sup> | #2 |
|----|----------------|-----------------|--------------|----------------|-----------------|----|
| 1  | 102.05496      | 51.53112        | T            |                |                 | 20 |
| 2  | 265.11828      | 133.06278       | Y            | 2627.07010     | 1314.03869      | 19 |
| 3  | 394.16088      | 197.58408       | E            | 2464.00677     | 1232.50702      | 18 |
| 4  | 465.19799      | 233.10263       | A            | 2334.96417     | 1167.98573      | 17 |
| 5  | 578.28205      | 289.64467       | L            | 2263.92706     | 1132.46717      | 16 |
| 6  | 665.31408      | 333.16068       | S            | 2150.84300     | 1075.92514      | 15 |
| 7  | 825.34473      | 413.17600       | C-Carbami... | 2063.81097     | 1032.40912      | 14 |
| 8  | 882.36619      | 441.68674       | G            | 1903.78032     | 952.39380       | 13 |
| 9  | 1230.49833     | 615.75280       | W-Hex(1)     | 1846.75886     | 923.88307       | 12 |
| 10 | 1317.53036     | 659.26882       | S            | 1498.62672     | 749.81700       | 11 |
| 11 | 1388.56747     | 694.78737       | A            | 1411.59469     | 706.30098       | 10 |
| 12 | 1736.69961     | 868.85344       | W-Hex(1)     | 1340.55758     | 670.78243       | 9  |
| 13 | 1823.73164     | 912.36946       | S            | 992.42544      | 496.71636       | 8  |
| 14 | 1920.78440     | 960.89584       | P            | 905.39341      | 453.20034       | 7  |
| 15 | 2106.86371     | 1053.93550      | W            | 808.34065      | 404.67396       | 6  |
| 16 | 2207.91139     | 1104.45933      | T            | 622.26134      | 311.63431       | 5  |
| 17 | 2278.94851     | 1139.97789      | A            | 521.21366      | 261.11047       | 4  |
| 18 | 2438.97916     | 1219.99322      | C-Carbami... | 450.17654      | 225.59191       | 3  |
| 19 | 2554.00610     | 1277.50669      | D            | 290.14590      | 145.57659       | 2  |
| 20 |                |                 | R            | 175.11895      | 88.06311        | 1  |

- 3 1445.58914 (2), 964.06142 (3)
- 2 1364.56274 (2), 910.04382 (3)
- 1 1283.53634 (2), 856.02622 (3)
- 1202.50994 (2), 802.00663 (3)

A00919\_1.raw #8142 RT: 22.8907 min  
FTMS, 1265.9821@Pd27.00, z=+2, Mono m/z=1364.56274 Da, MH+=2720.11021 Da, Match Tol.=20 ppm

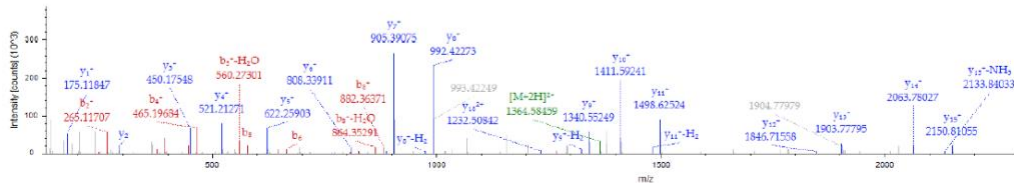

**TSR7 [Y].TDCGTEIPGWTPWTSW.[S]**

| #1 | b <sup>+</sup> | b <sup>2+</sup> | Seq.         | y <sup>+</sup> | y <sup>2+</sup> | #2 |
|----|----------------|-----------------|--------------|----------------|-----------------|----|
| 1  | 102.05496      | 51.53112        | T            |                |                 | 16 |
| 2  | 217.08190      | 109.04459       | D            | 2116.86919     | 1058.93824      | 15 |
| 3  | 377.11255      | 189.05991       | C-Carbami... | 2001.84225     | 1001.42476      | 14 |
| 4  | 434.13401      | 217.57064       | G            | 1841.81160     | 921.40944       | 13 |
| 5  | 535.18169      | 268.09448       | T            | 1784.79014     | 892.89871       | 12 |
| 6  | 664.22428      | 332.61578       | E            | 1683.74246     | 842.37487       | 11 |
| 7  | 777.30835      | 389.15781       | I            | 1554.69987     | 777.85357       | 10 |
| 8  | 874.36111      | 437.68419       | P            | 1441.61580     | 721.31154       | 9  |
| 9  | 931.38257      | 466.19492       | G            | 1344.56304     | 672.78516       | 8  |
| 10 | 1279.51471     | 640.26099       | W-Hex(1)     | 1287.54158     | 644.27443       | 7  |
| 11 | 1380.56239     | 690.78483       | T            | 939.40944      | 470.20836       | 6  |
| 12 | 1477.61515     | 739.31121       | P            | 838.36176      | 419.68452       | 5  |
| 13 | 1825.74729     | 913.37728       | W-Hex(1)     | 741.30900      | 371.15814       | 4  |
| 14 | 1926.79497     | 963.90112       | T            | 393.17686      | 197.09207       | 3  |
| 15 | 2013.82699     | 1007.41714      | S            | 292.12918      | 146.56823       | 2  |
| 16 |                |                 | W            | 205.09715      | 103.05222       | 1  |

- 3 1190.48941 (2)
- 2 1109.46301 (2)
- 1 1028.43661 (2)
- 947.41021 (2)

A051820\_3.raw #10679 RT: 27.6720 min  
FTMS, 1109.9636@hcd27.00, z=+2, Mono m/z=1109.46301 Da, MH+=2217.91875 Da, Match Tol.=30 ppm

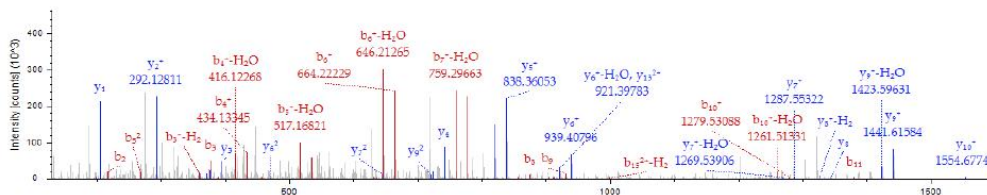

TSR8 [F].CPGEATQEEPCSPVPVPSAWGLWASW.[S]

| #1 | b <sup>+</sup> | b <sup>2+</sup> | b <sup>3+</sup> | Seq.         | y <sup>+</sup> | y <sup>2+</sup> | y <sup>3+</sup> | #2 |
|----|----------------|-----------------|-----------------|--------------|----------------|-----------------|-----------------|----|
| 1  | 161.03793      | 81.02260        | 54.35083        | C-Carbami... |                |                 |                 | 28 |
| 2  | 258.09069      | 129.54898       | 86.70175        | P            | 3319.44459     | 1660.22593      | 1107.15305      | 27 |
| 3  | 315.11215      | 158.08971       | 105.70890       | G            | 3222.39182     | 1611.69955      | 1074.80213      | 26 |
| 4  | 444.15475      | 222.58101       | 148.72310       | E            | 3165.37036     | 1583.18882      | 1055.79497      | 25 |
| 5  | 515.19186      | 258.09957       | 172.40214       | A            | 3036.32777     | 1518.66752      | 1012.78077      | 24 |
| 6  | 616.23954      | 308.62341       | 206.08470       | T            | 2965.29065     | 1483.14896      | 989.10174       | 23 |
| 7  | 744.29812      | 372.65270       | 248.77089       | Q            | 2864.24297     | 1432.62513      | 955.41918       | 22 |
| 8  | 873.34071      | 437.17399       | 291.78509       | E            | 2736.18440     | 1368.59584      | 912.73298       | 21 |
| 9  | 1002.38330     | 501.69529       | 334.79928       | E            | 2607.14180     | 1304.07454      | 869.71879       | 20 |
| 10 | 1099.43607     | 550.22167       | 367.15021       | P            | 2478.09921     | 1239.55324      | 826.70459       | 19 |
| 11 | 1259.46671     | 630.23700       | 420.49376       | C-Carbami... | 2381.04645     | 1191.02686      | 794.35367       | 18 |
| 12 | 1346.49874     | 673.75301       | 449.50443       | S            | 2221.01580     | 1111.01154      | 741.01012       | 17 |
| 13 | 1443.55151     | 722.27939       | 481.85535       | P            | 2133.98377     | 1067.49552      | 711.99944       | 16 |
| 14 | 1540.60427     | 770.80577       | 514.20627       | P            | 2036.93101     | 1018.96914      | 679.64852       | 15 |
| 15 | 1639.67268     | 820.33998       | 547.22908       | V            | 1939.87824     | 970.44276       | 647.29760       | 14 |
| 16 | 1799.70333     | 900.35530       | 600.57263       | C-Carbami... | 1840.80983     | 920.90855       | 614.27479       | 13 |
| 17 | 1896.75610     | 948.88169       | 632.92355       | P            | 1680.77918     | 840.89323       | 560.93124       | 12 |
| 18 | 1995.82451     | 998.41589       | 665.94635       | V            | 1583.72642     | 792.36685       | 528.58032       | 11 |
| 19 | 2092.87727     | 1046.94227      | 698.29728       | P            | 1484.65800     | 742.83264       | 495.55752       | 10 |
| 20 | 2179.90930     | 1090.45829      | 727.30795       | S            | 1387.60524     | 694.30626       | 463.20660       | 9  |
| 21 | 2250.94642     | 1125.97685      | 750.98699       | A            | 1300.57321     | 650.79024       | 434.19592       | 8  |
| 22 | 2599.07855     | 1300.04291      | 867.03104       | W-Hex(1)     | 1229.53610     | 615.27169       | 410.51688       | 7  |
| 23 | 2656.10002     | 1328.55365      | 886.03819       | G            | 881.40396      | 441.20562       | 294.47284       | 6  |
| 24 | 2769.18408     | 1385.09568      | 923.73288       | L            | 824.38250      | 412.69489       | 275.46568       | 5  |
| 25 | 3117.31622     | 1559.16175      | 1039.77692      | W-Hex(1)     | 711.29843      | 356.15285       | 237.77100       | 4  |
| 26 | 3188.35333     | 1594.68030      | 1063.45596      | A            | 363.16630      | 182.08679       | 121.72695       | 3  |
| 27 | 3275.38536     | 1638.19632      | 1092.46664      | S            | 292.12918      | 146.56823       | 98.04791        | 2  |
| 28 |                |                 |                 | W            | 205.09715      | 103.05222       | 69.03724        | 1  |

- 3 1214.51015 (3)
- 2 1160.49255 (3)
- 1 1106.47495 (3)
- 1052.45735 (3)

AI101820\_1.raw #6237 RT: 17.1238 min  
FTMS, 1161.1606@hcd27.00, z=+3, Mono m/z=1160.49255 Da, MH+=2479.46311 Da, Match Tol=30 ppm

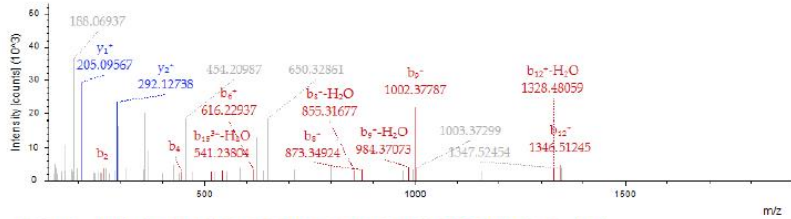

TSR9 [R].CPVACGWSPWTPWSPCSQSCNVGIR.[R]

| #1 | b <sup>+</sup> | b <sup>2+</sup> | b <sup>3+</sup> | Seq.         | y <sup>+</sup> | y <sup>2+</sup> | y <sup>3+</sup> | #2 |
|----|----------------|-----------------|-----------------|--------------|----------------|-----------------|-----------------|----|
| 1  | 144.01138      | 72.50933        | 48.67531        | C-Carbami... |                |                 |                 | 25 |
| 2  | 241.06414      | 121.03571       | 81.02623        | P            | 3259.40168     | 1630.20448      | 1087.13874      | 24 |
| 3  | 340.13255      | 170.56992       | 114.04904       | V            | 3162.34891     | 1581.67809      | 1054.78782      | 23 |
| 4  | 411.16967      | 206.08847       | 137.72807       | A            | 3063.28050     | 1532.14389      | 1021.76502      | 22 |
| 5  | 571.20032      | 286.10380       | 191.07162       | C-Carbami... | 2992.24339     | 1496.62533      | 998.08598       | 21 |
| 6  | 628.22178      | 314.61453       | 210.07878       | G            | 2832.21274     | 1416.61001      | 944.74243       | 20 |
| 7  | 814.30109      | 407.65418       | 272.10522       | W            | 2775.19127     | 1388.09927      | 925.73528       | 19 |
| 8  | 1209.44385     | 605.22556       | 403.81947       | S-Hex(1)F... | 2589.11196     | 1295.05962      | 863.70884       | 18 |
| 9  | 1306.49662     | 653.75195       | 436.17039       | P            | 2193.96920     | 1097.48824      | 731.99458       | 17 |
| 10 | 1492.57593     | 746.79160       | 498.19683       | W            | 2096.91644     | 1048.96186      | 699.64366       | 16 |
| 11 | 1593.62361     | 797.31544       | 531.87939       | T            | 1910.83712     | 955.92220       | 637.61723       | 15 |
| 12 | 1690.67637     | 845.84182       | 564.23031       | P            | 1809.78944     | 905.39836       | 603.93467       | 14 |
| 13 | 2038.80851     | 1019.90789      | 680.27435       | W-Hex(1)     | 1712.73668     | 856.87198       | 571.58374       | 13 |
| 14 | 2125.84054     | 1063.42391      | 709.28503       | S            | 1364.60454     | 682.80591       | 455.53970       | 12 |
| 15 | 2222.89330     | 1111.95029      | 741.63595       | P            | 1277.57252     | 639.28990       | 426.52902       | 11 |
| 16 | 2382.92395     | 1191.96561      | 794.97950       | C-Carbami... | 1180.51975     | 590.76351       | 394.17810       | 10 |
| 17 | 2469.95598     | 1235.48163      | 823.99018       | S            | 1020.48910     | 510.74819       | 340.83455       | 9  |
| 18 | 2598.01456     | 1299.51092      | 866.67637       | Q            | 933.45708      | 467.23218       | 311.82388       | 8  |
| 19 | 2685.04658     | 1343.02693      | 895.68705       | S            | 805.39850      | 403.20289       | 269.13768       | 7  |
| 20 | 2845.07723     | 1423.04225      | 949.03060       | C-Carbami... | 718.36647      | 359.68687       | 240.12701       | 6  |
| 21 | 2959.12016     | 1480.06372      | 987.04490       | N            | 558.33582      | 279.67155       | 186.78346       | 5  |
| 22 | 3058.18857     | 1529.59792      | 1020.06771      | V            | 444.29289      | 222.65009       | 148.76915       | 4  |
| 23 | 3115.21004     | 1558.10866      | 1039.07486      | G            | 345.22448      | 173.11588       | 115.74634       | 3  |
| 24 | 3228.29410     | 1614.65069      | 1076.76955      | I            | 288.20302      | 144.60515       | 96.73919        | 2  |
| 25 |                |                 |                 | R            | 175.11895      | 88.06311        | 59.04450        | 1  |

- 3 1242.89157 (3)
- 2 1188.81997 (3)
- 1 1134.80237 (3)
- 1080.78477 (3)

AI061920\_2.raw #6629 RT: 27.0424 min  
FTMS, 1134.8024@hcd27.00, z=+3, Mono m/z=1134.80237 Da, MH+=3402.39255 Da, Match Tol=30 ppm

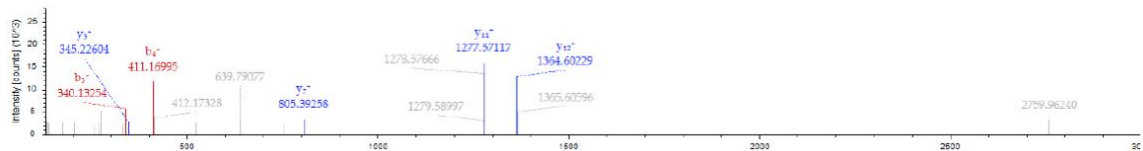

**Supplemental Figure 4. *Adamts3* and *Spon1* mRNA localization in brain at E16 and P4**

**(A-H) *Adamts3* mRNA localization at E16 (A-D) and P4 (E-H).** Areas indicated by black rectangles in panel A and E are expanded in panels B-D and F-H, respectively. **(I-P) *Spon1* mRNA localization at E16 (I-L) and P4 (M-P).** Areas indicated by black rectangles in I and M are expanded in J-L and N-P, respectively. Scale bars: panels A, E, I, M and insets 500  $\mu$ m; panels B-D, F-H, J-L, and N-P 50  $\mu$ m. Abbreviations: vz, ventricular zone of cortex; cp, choroid plexus; ec, ependymal cells of lateral ventricle; sco, subcommissural organ

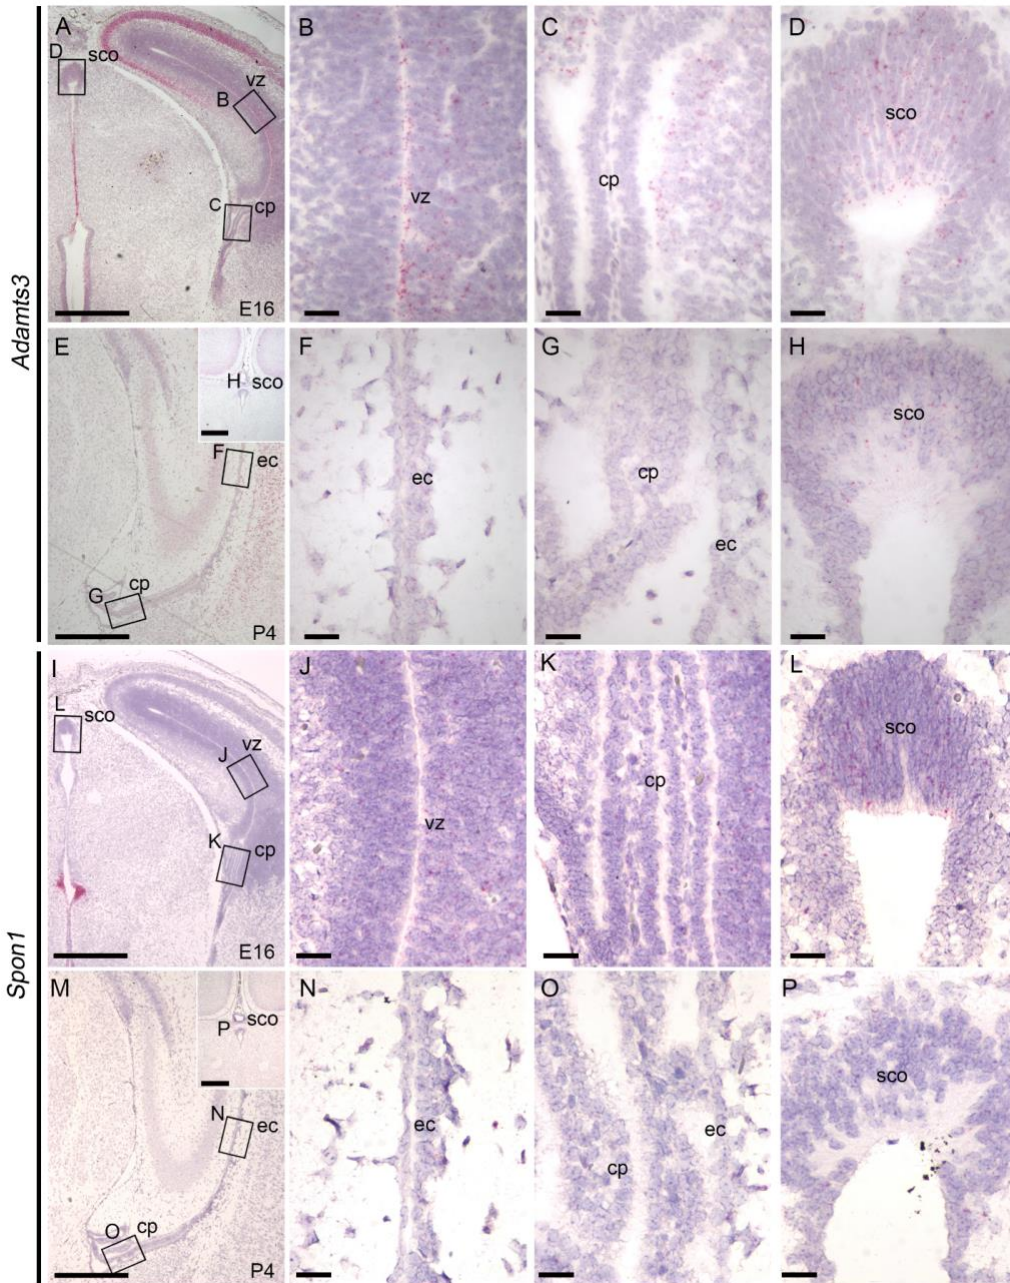



### ***Supplementary References***

- Bang SP, Yeon CY, Adhikari N, Neupane S, Kim H, Lee DC, Son MJ, Lee HG, Kim JY, Jun JH. 2019. Cyclosporine A eyedrops with self-nanoemulsifying drug delivery systems have improved physicochemical properties and efficacy against dry eye disease in a murine dry eye model. *PLoS One*, 14:e0224805.
- Deldicque L, Bertrand L, Patton A, Francaux M, Baar K. 2011. ER stress induces anabolic resistance in muscle cells through PKB-induced blockade of mTORC1. *PLoS One*, 6:e20993.
